# Supplementary material
Source: MDPI journal article supplement (https://www.mdpi.com/2297-8739/10/3/219)
Supplement: s1 [file s1]

# ZIF-8 Assisted Polyacrylamide Functionalized Silica Core-Shell Stationary Phase for Hydrophilic Interaction Liquid Chromatography

Tong Zhang <sup>1,2</sup>, Yijing Li <sup>1</sup>, Xiaofeng Lu <sup>1</sup>, Yong Guo <sup>1</sup>, Licheng Wang <sup>1,\*</sup> and Xiaojing Liang <sup>1,\*</sup>

<sup>1</sup> Lanzhou Institute of Chemical Physics, Chinese Academy of Sciences, Lanzhou 730000, China

<sup>2</sup> University of Chinese Academy of Sciences, Beijing 100049, China

\* Correspondence: wanglc@licp.cas.cn (L.W.); xjliang@licp.cas.cn (X.L.)

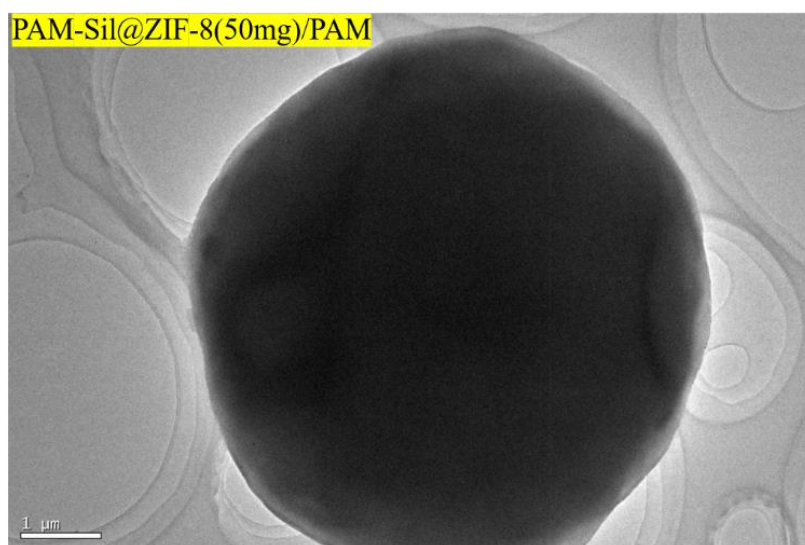

Figure S1. TEM image of PAM-Sil@ZIF-8(50mg)/PAM

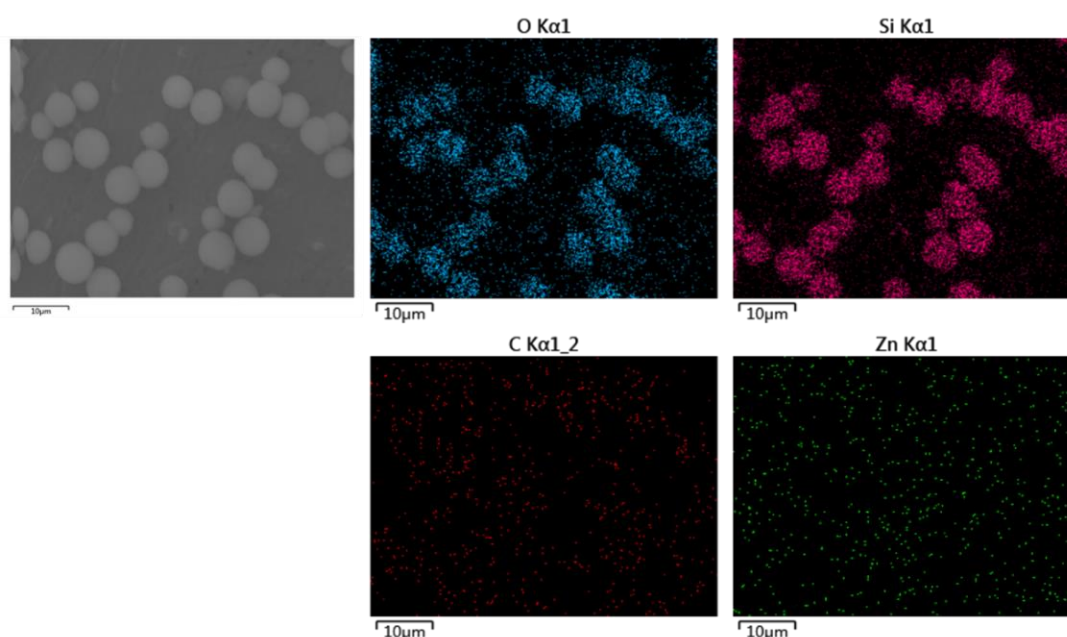

Figure S2. EDS images of PAM-Sil@ZIF-8(50mg)/PAM and distribution of O, Si, C and Zn elements

Table S1. BET analysis results of bare silica, PAM/Sil and PAM-Sil@ZIF-8(50mg)/PAM.

| BET Analysis                                 | Bare silica | Sil/PAM | PAM-Sil@ZIF-8(50mg)/PAM |
|----------------------------------------------|-------------|---------|-------------------------|
| BET Surface Area (m <sup>2</sup> /g)         | 371.5       | 312.9   | 354.4                   |
| Adsorption pores volume (cm <sup>3</sup> /g) | 0.69        | 0.65    | 0.67                    |
| Adsorption average pore width (nm)           | 7.4         | 8.3     | 7.6                     |

Table S2. The resolution of five alkaloids over different columns

| The type of columns     | Resolution               |                        |                         |                        |           |
|-------------------------|--------------------------|------------------------|-------------------------|------------------------|-----------|
|                         | Caffeine                 | Colchicine             | Theophylline            | Berberine              | Coptisine |
| PAM-Sil@ZIF-8(50mg)/PAM | R <sub>1/2</sub> =0.96   | R <sub>2/3</sub> =2.89 | R <sub>3/4</sub> =2.16  | R <sub>4/5</sub> =1.09 |           |
| Sil/PAM                 | R <sub>1/2,3</sub> =0.62 | R <sub>2/3</sub> =0    | R <sub>2,3/4</sub> =4.5 | R <sub>4/5</sub> =0.84 |           |
| amino-modified silica   | R <sub>1/2,3</sub> =0.33 | R <sub>2/3</sub> =0.33 | R <sub>3/4</sub> =0.64  | R <sub>4/5</sub> =0.49 |           |

Table S3. Column efficiency of five analytes over different columns

| The type of columns     | Column efficiency(plates/m) |            |              |           |           |
|-------------------------|-----------------------------|------------|--------------|-----------|-----------|
|                         | Caffeine                    | Colchicine | Theophylline | Berberine | Coptisine |
| PAM-Sil@ZIF-8(50mg)/PAM | 4667.5                      | 7861.9     | 1659.9       | 4472.1    | 5312.3    |
| Sil/PAM                 | 6072.7                      | -          | -            | 1634.8    | 3564.1    |
| amino-modified silica   | 1689.6                      | 1043.1     | 844.3        | 2976.5    | 622.8     |

Table S4. The results of regression coefficient of Eq. (1) for five amino acids on the PAM-Sil@ZIF-8(50mg)/PAM.

| Analytes         | a        | b       | c       | R <sup>2</sup> |
|------------------|----------|---------|---------|----------------|
| L-tryptophan     | -9.4979  | -5.7339 | 12.2663 | 0.9845         |
| DL-phenylalanine | -8.4638  | -5.3847 | 11.1194 | 0.9872         |
| L-isoleucine     | -7.8861  | -5.2132 | 10.3120 | 0.9840         |
| L-valine         | -7.3729  | -5.1611 | 9.5110  | 0.9890         |
| L-serine         | -10.3908 | -7.0068 | 13.9572 | 0.9771         |

Table S5. Fitting coefficients and corresponding correlation coefficient for Eq. (2)

| Analytes   | $\Delta S(\text{J}\cdot\text{mol}^{-1}\cdot\text{K}^{-1})$ | $\Delta H(\text{kJ}\cdot\text{mol}^{-1}\cdot\text{K}^{-1})$ | R <sup>2</sup> |
|------------|------------------------------------------------------------|-------------------------------------------------------------|----------------|
| Uridine    | -60.06                                                     | -17.17                                                      | 0.9680         |
| Adenosine  | -43.80                                                     | -13.99                                                      | 0.9817         |
| Inosine    | -45.29                                                     | -15.41                                                      | 0.9740         |
| Cytosine   | -32.30                                                     | -12.52                                                      | 0.9856         |
| Citicoline | -51.42                                                     | -19.02                                                      | 0.9912         |

Table S6. Reproducibility of PAM-Sil@ZIF-8(50mg)/PAM.

| Analytes   | RSD(n=7) |
|------------|----------|
| uridine    | 0.27%    |
| adenosine  | 0.22%    |
| inosine    | 0.51%    |
| Cytosine   | 0.34%    |
| Citicoline | 0.97%    |

Table S7. Stability of PAM-Sil@ZIF-8(50mg)/PAM

| Analytes   | RSD(n=10) |
|------------|-----------|
| uridine    | 0.57%     |
| adenosine  | 0.68%     |
| inosine    | 0.99%     |
| Cytosine   | 1.86%     |
| Citicoline | 1.04%     |
